# Supplementary material
Source: publisher figshare collection journal article supplement (https://wellcome.figshare.com/articles/dataset/_/6087140)
Supplement: Supplementary file 1 [file 1]

## Sheet: review
Website	Countries covered	Study protocol(s)	Data documentation	Data access	Online data visualisation/analysis tool	Online links to/descriptions of publications	Use of social media/other forms of communication
Avon Longtudinal Study of Parents and Children	UK	Questionnaires available as PDFs	Downloadable data dictionary	Data access policy and guidance available online (PDF)	No	Yes	Facebook, Google+, Soundcloud, MyYahoo, YouTube, Twitter and QR code
ELFE, Growing up in France	France	Online description of key stages			No	Yes	Newsletter
European Prospective Investigation into Cancer and Nutrition (EPIC)	Lyon, UK (London), Denmark, France, Germany, Greece, Italy, Norway, Spain, Sweden, The Netherlands	Questionnaires and statistical methods	Questionnaires and descriptions of the cohort/anthropometric measurements availble online. All measurements were standardised using EPIC-SOFT (available in multiple languages) to enable comparison.		No	Yes	RSS and LinkedIn
European Social Survey	Albania, Austria, Belgium, Bulgaria, Croatia, Cyprus, Czech Republic, Denmark, Estonia, Finland, France, Germany, Greece, Hungary, Iceland, Ireland, Israel, Italy, Kosovo, Latvia, Lithuania, Luxembourg, The Netherlands, Norway, Poland, Portugal, Romania, Russian federation, Slovakia, Slovenia, Spain, Sweden, Switzerland, Turkey, Ukraine, UK	Online descriptions and PDFs	Available online by year, country and theme	Data is available for download online in SAS, SPSS and STATA	Yes	Yes	Email
INDEPTH Data Repository	South Africa, Guinea Bissau, Senegal, Ethiopia, Ghana, Gambia, Tanzania, Uganda, Malawi, Burkina Faso, Kenya, Mozambique, Nigeria, Cote d'Ivoire, India, Bangladesh, Vietnam, Cambodia, Thailand, Indonesia, Papua New Guinea	Study overviews available online	Online data dictionaries available with variable names, labels and descriptions. DDI compliant metadata is available. Downloadable microdata (must register/login)	Two types: 'Public use files' and 'Licensed files' and data can be filtered according to centre.	Yes	Yes	Email
Integrated Public Use Microdata Series, International (IPUMS)	Argentina, Armenia, Austria, Bangladesh, Belarus, Bolivia, Brazil, Burkina Faso, Cambodia, Cameroon, Canada, Chile, China, Colombia, Costa Rica, Ecuador, Egypt, El Salvador, Fiji, France, Germany, Ghana, Guinea, Greece, Haiti, Hungary, India, Indonesia, Iraq, Iran, Ireland, Israel, Italy, Jamaica, Jordan, Kenya, Kyrgyz Republic, Malawi, Malaysia, Mali, Mexico, Mongolia, Morocco, Nepal, Netherland…	Questionnaires available as PDFs and HTML	When data are extracted, codebooks are generated.	Online variable selection (integrated and harmonised variables options available). Users must be registered before data extracts may be downloaded. Extract system provides support for the import of generated ASCII files into SPSS, SAS and STATA.	Yes	Yes	Newsletter
Measure DHS, Demographic Health Surveys	Angola, Benin, Botswana, Burkina Faso, Burundi, Cameroon, Cape Verde, Central African Republic, Chad, Comoros, Congo (Brazzaville), Congo Democratic Republic, Cote d'Ivoire, Equatorial Guinea, Eritrea, Ethiopia, Gabon, Gambia, Ghana, Guinea, Kenya, Lesotho, Liberia, Madagascar, Malawi, Mali, Mauritania, Mozambique, Namibia, Niger, Nigeria, Nigeria (Ondo State), Rwanda, Sao Tome and Principe, Sene…	Questionnaires are available for download (PDF)	Data are recoded (variable names, locations etc.) with all recording manuals available for download online. Use the DHS Recode.	Must be a registered user of the website. Application for data must include contact information, research project title, description of intended analysis. Certain data require users to sign additional agreements/terms of use. Files are distributed as compressed Zip files. List of potential data downloads is available online. Data are available in ASCII, STATA, SPSS, SAS and CSPro	HIV/AIDS Survey Indicators Database & STAT compiler	Yes	Email, Facebook, Twitter, YouTube, LinkedIn, Pinterest, Blog and Mobile phone app	http://hivdata.dhsprogram.com/start.cfm	http://statcompiler.com/
MIDUS Midlife in the United States	United States of America	Available in catalogue/ICPSR website	Categories, codes, variable grouping etc. available through Colectica catalogue. DDI Codebook/Lifecycle, Dublin Core and MARC21 XML metadata	Data is available for download online in SAS, SPSS, STATA, ASCII and Delimited from ICPSR website	No	Yes	To download or upload data, you can log in through LinkedIn, Facebook, Google or MyData
Norwegian Mother and Child Cohort Study (Norway)	Norway	Online description and downloadable questionnaires	Basic participant response figures available online for version VIII	Applications must be submitted and approved before use of data and/or biological materials is enabled. Researcher(s) may need to sign a contract with the Norwegian Institute of Public Health	No	Yes	Facebook, Twitter, YouTube, RSS feed and newsletter
Scottish Longitudinal Study	Scotland	Online descriptions of creation/development available as individual 'Technical Working Paper'	Online data dictionary with searchable lists of tables and variables	2 methods - 'safe setting' in Edinburgh or remote access involving use of variable names and labels only for creation of syntaxes. These syntaxes are then returned to the Support Officer who will arrange for the analysis to be run and the results, once cleared returned. More details available online	No	Yes	Twitter, email, blog
Study of Environment on Aboriginal Resilience and Child Health	Australia	Study protocol available as an academic paper		Describes 'SURE' Secure, Unified Research Environment' but does not make it clear if SEARCH data can be accessed	No	Yes	Email, facebook, RSS, LinkedIn and Twitter
WHO Study on Global AGEing and Adult Health (SAGE)	South Africa, China, Ghana, India, Mexico, Russian Federation	Summary of measures in questionnaires and the questionnaires themselves available in PDF	Related materials, study description, data dictionary (variables include name, label and question) and related citations all available. DDI compliant metadata available in PDF.	Through WHO Multi-Country Studies Data Archive.	No	Yes	RSS, YouTube, twitter, Facebook and Google+
Worldwide Antimalarial Resistance Network	Bangkok (Thailand), Nairobi (Kenya), São Paulo (Brazil), Dakar (Senegal)	Searchable procedures available for download	When sharing data (clinical, pharmacology, In vitro) data dictionaries should be accompany data	WWARN standardise data and then make these available including of audit trail and orginal dataset to the data contributor and nominated individuals. Researchers (under 'Third party data access') should contact the data owner(s) as they alone can grant access to the transformed data.	Yes	Yes	Facebook and twitter

## Sheet: codes for data validation
Yes	states next step, furture aims, next research goals
No	does not state next step, furture aims, next research goals
Unclear	describes current work but does not provide a clear indication of next step

## Sheet: all studies and organisations
ID	Name
1	1958 National Child Development Study (UK)
2	1970 British Cohort Study (UK)
3	ALPHA Network
4	Analysis of a sample of type 2 diabetic patients with obesity or overweight and at cardiovascular risk: a cross sectional study in Spain
5	Australasian Association of Cancer Registries
6	Avon Longitudinal Study of Parents and Children (UK)
7	Birth to Twenty
8	Born in Bradford (UK)
9	Cancer Registries
10	CartaGene
11	Concord 2
12	ELFE, Growing up in France (France)
13	European Prospective Investigation into Cancer and Nutrition (EPIC)
14	European Social Survey
15	Generation Scotland (UK)
16	Growing up in New Zealand
17	ICPSR
18	INDEPTH Network
19	International Epidemiological Databases to Evaluate AIDS (leDEA) in sub-Saharan Africa
20	IPUMS International Project
21	Longitudinal Study of Young People in England (UK)
22	Measure DHS, Demographic Health Surveys
23	MIDUS Midlife in the US
24	Millennium Cohort Study (UK)
25	Monitoring the efficacy and safety of three artemisinin based-combinations therapies in Senegal: results from two years surveillance
26	Norwegian Mother and Child Cohort Study (Norway)
27	Pelotas Birth Cohort Study
28	Population Health Metrics Research Consortium Gold Standard Verbal Autopsy Data 2005–2011
29	Prevalence of schistosome antibodies with hepatosplenic signs and symptoms among patients from Kaoma, Western Province, Zambia
30	RAND Centre for the Study of Ageing
31	SABE - Survey on Health, Well-Being and Aging in Latin America and the Caribbean
32	SABRE Southall and Brent Revisited
33	Scottish Longitudinal Study (Scotland)
34	Study of Environment on Aboriginal Resilience and Child Health
35	The China Kadoorie Biobank
36	The China-Anhui birth cohort study
37	The Epidemiology - France web portal A collaborative project in epidemiology
38	The International Collaboration of Incident HIV and Hepatitis C in Injecting Cohorts Study
39	The Limache birth cohort study
40	The Motorik-Modul Longitudinal Study (Germany)
41	The National Survey of Sexual Attitudes and Lifestyles (UK)
42	The spectrum of paediatric cardiac disease presenting to an outpatient clinic in Malawi
43	TwinsUK and Healthy Aging Twin Study (UK)
44	Udaipur health and Immunization studies
45	UK Biobank (UK)
46	Understanding Society (UK)
47	Whitehall Study (UK)
48	WHO Study on Global AGEing and Adult Helath (SAGE)
49	Worldwide Antimalarial Resistance Network

## Sheet: Sample
ID	Name	Coverage	Source
6	Avon Longitudinal Study of Parents and Children (UK)	UK	http://www.bristol.ac.uk/alspac/
12	ELFE, Growing up in France (France)	France	http://www.elfe-france.fr/index.php/en/
13	European Prospective Investigation into Cancer and Nutrition (EPIC)	Lyon, UK (London), Denmark, France, Germany, Greece, Italy, Norway, Spain, Sweden, The Netherlands	epic.iarc.fr/index.php
14	European Social Survey	Albania, Austria, Belgium, Bulgaria, Croatia, Cyprus, Czech Republic, Denmark, Estonia, Finland, France, Germany, Greece, Hungary, Iceland, Ireland, Israel, Italy, Kosovo, Latvia, Lithuania, Luxembourg, The Netherlands, Norway, Poland, Portugal, Romania, Russian federation, Slovakia, Slovenia, Spain, Sweden, Switzerland, Turkey, Ukraine, UK	http://www.europeansocialsurvey.org/
18	INDEPTH Network	South Africa, Guinea Bissau, Senegal, Ethiopia, Ghana, Gambia, Tanzania, Uganda, Malawi, Burkina Faso, Kenya, Mozambique, Nigeria, Cote d'Ivoire, India, Bangladesh, Vietnam, Cambodia, Thailand, Indonesia, Papua New Guinea	http://www.indepth-ishare.org/index.php/home
20	IPUMS International Project	Argentina, Armenia, Austria, Bangladesh, Belarus, Bolivia, Brazil, Burkina Faso, Cambodia, Cameroon, Canada, Chile, China, Colombia, Costa Rica, Ecuador, Egypt, El Salvador, Fiji, France, Germany, Ghana, Guinea, Greece, Haiti, Hungary, India, Indonesia, Iraq, Iran, Ireland, Israel, Italy, Jamaica, Jordan, Kenya, Kyrgyz Republic, Malawi, Malaysia, Mali, Mexico, Mongolia, Morocco, Nepal, Netherland…	https://international.ipums.org/international/
22	Measure DHS, Demographic Health Surveys	Angola, Benin, Botswana, Burkina Faso, Burundi, Cameroon, Cape Verde, Central African Republic, Chad, Comoros, Congo (Brazzaville), Congo Democratic Republic, Cote d'Ivoire, Equatorial Guinea, Eritrea, Ethiopia, Gabon, Gambia, Ghana, Guinea, Kenya, Lesotho, Liberia, Madagascar, Malawi, Mali, Mauritania, Mozambique, Namibia, Niger, Nigeria, Nigeria (Ondo State), Rwanda, Sao Tome and Principe, Sene…	http://dhsprogram.com/Data/
23	MIDUS Midlife in the US	United States of America	http://www.midus.wisc.edu/
26	Norwegian Mother and Child Cohort Study (Norway)	Norway	http://www.fhi.no/eway/default.aspx?pid=240&trg=Main_6664&Main_6664=6894:0:25,7372:1:0:0:::0:0
33	Scottish Longitudinal Study (Scotland)	Scotland	http://sls.lscs.ac.uk/
34	Study of Environment on Aboriginal Resilience and Child Health	Australia	https://www.saxinstitute.org.au/our-work/search/
48	WHO Study on Global AGEing and Adult Helath (SAGE)	South Africa, China, Ghana, India, Mexico, Russian Federation	http://www.who.int/healthinfo/sage/en/
49	Worldwide Antimalarial Resistance Network	Thailand, Kenya, Brazil, Senegal	http://www.wwarn.org/
