# Supplementary material
Source: publisher figshare collection journal article supplement (https://wellcome.figshare.com/articles/dataset/_/6087140)
Supplement: Supplementary file 3 [file 1]

# Enhancing discoverability of public health and epidemiology research data: Report Annexes

---

## Contents

|                                                                               |    |
|-------------------------------------------------------------------------------|----|
| Annex A: Data Documentation and Access: Characterizing Current Practice ..... | 2  |
| Annex B: Profiles – Documenting Cohorts and Data Resources .....              | 10 |
| Cohort Profiles .....                                                         | 10 |
| Case Study.....                                                               | 10 |
| Data Resource Profiles.....                                                   | 10 |
| Annex C: Survey Questionnaire .....                                           | 12 |
| Annex D: Results of Online Survey.....                                        | 22 |
| Employment of respondents .....                                               | 22 |
| Geographical regions of respondents.....                                      | 22 |
| Role in public health .....                                                   | 23 |
| Most common funders .....                                                     | 24 |
| Forms of data .....                                                           | 24 |
| Involvement in the data lifecycle.....                                        | 25 |
| How best to improve data discoverability – importance .....                   | 25 |
| Preferred search techniques.....                                              | 25 |
| Use of repositories.....                                                      | 26 |
| Controlled vocabularies and thesauri.....                                     | 27 |
| Data documentation – use of standards.....                                    | 27 |
| First heard about data journals.....                                          | 28 |
| Benefits of data citation.....                                                | 28 |
| Needed granularity of data citation.....                                      | 29 |
| Mechanisms for managing longitudinal and regularly changing data sets .....   | 29 |
| Annex E: Topic Guidelines for Focus Groups .....                              | 30 |
| Annex F: Project Data Journal – Progress to Date .....                        | 31 |

# Annex A: Data Documentation and Access: Characterizing Current Practice

## List of Tables

1. The 49 Studies and Organisations
2. Sample
3. The Review

## Review

Of the 49 studies/organisations previously identified, a random sample of 13 were reviewed to identify exemplar current practices in data documentation and access.

Initial key findings were:

- ▶ PDF is one of the most common formats.
- ▶ All provide links to and/or descriptions of publications.
- ▶ Of the 13 reviewed, SAS, STATA and SPSS are the statistical packages most commonly supported. Other such formats include ASCII and CPro.
- ▶ Of the 13 reviewed, 4 offer online data visualisation/analysis tools.

## 1: The 49 studies and organisations

| <b>ID</b> | <b>Name</b>                                                                                                                              |
|-----------|------------------------------------------------------------------------------------------------------------------------------------------|
| 1         | 1958 National Child Development Study (UK)                                                                                               |
| 2         | 1970 British Cohort Study (UK)                                                                                                           |
| 3         | ALPHA Network                                                                                                                            |
| 4         | Analysis of a sample of type 2 diabetic patients with obesity or overweight and at cardiovascular risk: a cross sectional study in Spain |
| 5         | Australasian Association of Cancer Registries                                                                                            |
| 6         | Avon Longitudinal Study of Parents and Children (UK)                                                                                     |
| 7         | Birth to Twenty                                                                                                                          |
| 8         | Born in Bradford (UK)                                                                                                                    |
| 9         | Cancer Registries                                                                                                                        |
| 10        | CartaGene                                                                                                                                |
| 11        | Concord 2                                                                                                                                |
| 12        | ELFE, Growing up in France (France)                                                                                                      |
| 13        | European Prospective Investigation into Cancer and Nutrition (EPIC)                                                                      |
| 14        | European Social Survey                                                                                                                   |
| 15        | Generation Scotland (UK)                                                                                                                 |
| 16        | Growing up in New Zealand                                                                                                                |
| 17        | ICPSR                                                                                                                                    |
| 18        | INDEPTH Network                                                                                                                          |
| 19        | International Epidemiological Databases to Evaluate AIDS (IeDEA) in sub-Saharan Africa                                                   |
| 20        | IPUMS International Project                                                                                                              |
| 21        | Longitudinal Study of Young People in England (UK)                                                                                       |
| 22        | Measure DHS, Demographic Health Surveys                                                                                                  |
| 23        | MIDUS Midlife in the US                                                                                                                  |
| 24        | Millennium Cohort Study (UK)                                                                                                             |
| 25        | Monitoring the efficacy and safety of three artemisinin based-combinations therapies in Senegal: results from two years surveillance     |
| 26        | Norwegian Mother and Child Cohort Study (Norway)                                                                                         |
| 27        | Pelotas Birth Cohort Study                                                                                                               |
| 28        | Population Health Metrics Research Consortium Gold Standard Verbal Autopsy Data 2005–2011                                                |
| 29        | Prevalence of schistosome antibodies with hepatosplenic signs and symptoms among patients from Kaoma, Western Province, Zambia           |
| 30        | RAND Centre for the Study of Ageing                                                                                                      |
| 31        | SABE - Survey on Health, Well-Being and Aging in Latin America and the Caribbean                                                         |
| 32        | SABRE Southall and Brent Revisited                                                                                                       |
| 33        | Scottish Longitudinal Study (Scotland)                                                                                                   |
| 34        | Study of Environment on Aboriginal Resilience and Child Health                                                                           |
| 35        | The China Kadoorie Biobank                                                                                                               |
| 36        | The China-Anhui birth cohort study                                                                                                       |
| 37        | The Epidemiology - France web portal A collaborative project in epidemiology                                                             |
| 38        | The International Collaboration of Incident HIV and Hepatitis C in Injecting Cohorts Study                                               |
| 39        | The Limache birth cohort study                                                                                                           |

|    |                                                                                         |
|----|-----------------------------------------------------------------------------------------|
| 40 | The Motorik-Modul Longitudinal Study (Germany)                                          |
| 41 | The National Survey of Sexual Attitudes and Lifestyles (UK)                             |
| 42 | The spectrum of paediatric cardiac disease presenting to an outpatient clinic in Malawi |
| 43 | TwinsUK and Healthy Aging Twin Study (UK)                                               |
| 44 | Udaipur health and Immunization studies                                                 |
| 45 | UK Biobank (UK)                                                                         |
| 46 | Understanding Society (UK)                                                              |
| 47 | Whitehall Study (UK)                                                                    |
| 48 | WHO Study on Global AGEing and Adult Health (SAGE)                                      |
| 49 | Worldwide Antimalarial Resistance Network                                               |

To see the more-detailed analysis of the websites of the selected data sets, please see the attached Excel spreadsheet appended to the report as a separate data file.

1: Sample

| <b>ID</b> | <b>Name</b>                                                         | <b>Coverage</b>                                                                                                                                                                                                                                                                                                                                                                                                                                                                                                                                                                                                                                                                                                             | <b>Source</b>                                                                                               |
|-----------|---------------------------------------------------------------------|-----------------------------------------------------------------------------------------------------------------------------------------------------------------------------------------------------------------------------------------------------------------------------------------------------------------------------------------------------------------------------------------------------------------------------------------------------------------------------------------------------------------------------------------------------------------------------------------------------------------------------------------------------------------------------------------------------------------------------|-------------------------------------------------------------------------------------------------------------|
| 6         | Avon Longitudinal Study of Parents and Children (UK)                | UK                                                                                                                                                                                                                                                                                                                                                                                                                                                                                                                                                                                                                                                                                                                          | <a href="http://www.bristol.ac.uk/alspac/">http://www.bristol.ac.uk/alspac/</a>                             |
| 12        | ELFE, Growing up in France (France)                                 | France                                                                                                                                                                                                                                                                                                                                                                                                                                                                                                                                                                                                                                                                                                                      | <a href="http://www.elfe-france.fr/index.php/en/">http://www.elfe-france.fr/index.php/en/</a>               |
| 13        | European Prospective Investigation into Cancer and Nutrition (EPIC) | Lyon, UK (London), Denmark, France, Germany, Greece, Italy, Norway, Spain, Sweden, The Netherlands                                                                                                                                                                                                                                                                                                                                                                                                                                                                                                                                                                                                                          | <a href="http://epic.iarc.fr/index.php">http://epic.iarc.fr/index.php</a>                                   |
| 14        | European Social Survey                                              | Albania, Austria, Belgium, Bulgaria, Croatia, Cyprus, Czech Republic, Denmark, Estonia, Finland, France, Germany, Greece, Hungary, Iceland, Ireland, Israel, Italy, Kosovo, Latvia, Lithuania, Luxembourg, The Netherlands, Norway, Poland, Portugal, Romania, Russian federation, Slovakia, Slovenia, Spain, Sweden, Switzerland, Turkey, Ukraine, UK                                                                                                                                                                                                                                                                                                                                                                      | <a href="http://www.europeansocialsurvey.org/">http://www.europeansocialsurvey.org/</a>                     |
| 18        | INDEPTH Network                                                     | South Africa, Guinea Bissau, Senegal, Ethiopia, Ghana, Gambia, Tanzania, Uganda, Malawi, Burkina Faso, Kenya, Mozambique, Nigeria, Cote d'Ivoire, India, Bangladesh, Vietnam, Cambodia, Thailand, Indonesia, Papua New Guinea                                                                                                                                                                                                                                                                                                                                                                                                                                                                                               | <a href="http://www.indepth-ishare.org/index.php/home">http://www.indepth-ishare.org/index.php/home</a>     |
| 20        | IPUMS International Project                                         | Argentina, Armenia, Austria, Bangladesh, Belarus, Bolivia, Brazil, Burkina Faso, Cambodia, Cameroon, Canada, Chile, China, Colombia, Costa Rica, Ecuador, Egypt, El Salvador, Fiji, France, Germany, Ghana, Guinea, Greece, Haiti, Hungary, India, Indonesia, Iraq, Iran, Ireland, Israel, Italy, Jamaica, Jordan, Kenya, Kyrgyz Republic, Malawi, Malaysia, Mali, Mexico, Mongolia, Morocco, Nepal, Netherlands, Nicaragua, Pakistan, Palestine, Panama, Peru, Philippines, Portugal, Puerto Rico, Romania, Rwanda, Saint Lucia, Senegal, Sierra Leone, Slovenia, South Africa, South Sudan, Spain, Sudan, Switzerland, Tanzania, Thailand, Turkey, Uganda, United Kingdom, United States, Uruguay, Venezuela, and Vietnam | <a href="https://international.ipums.org/international/">https://international.ipums.org/international/</a> |

|    |                                                                |                                                                                                                                                                                                                                                                                                                                                                                                                                                                                                                                                                                                                                                                                                                                                                                                                                                                                                                                                                                                                                               |                                                                                                                                                                                                                           |
|----|----------------------------------------------------------------|-----------------------------------------------------------------------------------------------------------------------------------------------------------------------------------------------------------------------------------------------------------------------------------------------------------------------------------------------------------------------------------------------------------------------------------------------------------------------------------------------------------------------------------------------------------------------------------------------------------------------------------------------------------------------------------------------------------------------------------------------------------------------------------------------------------------------------------------------------------------------------------------------------------------------------------------------------------------------------------------------------------------------------------------------|---------------------------------------------------------------------------------------------------------------------------------------------------------------------------------------------------------------------------|
| 22 | Measure DHS, Demographic Health Surveys                        | Angola, Benin, Botswana, Burkina Faso, Burundi, Cameroon, Cape Verde, Central African Republic, Chad, Comoros, Congo (Brazzaville), Congo Democratic Republic, Cote d'Ivoire, Equatorial Guinea, Eritrea, Ethiopia, Gabon, Gambia, Ghana, Guinea, Kenya, Lesotho, Liberia, Madagascar, Malawi, Mali, Mauritania, Mozambique, Namibia, Niger, Nigeria, Nigeria (Ondo State), Rwanda, Sao Tome and Principe, Senegal, Sierra Leone, South Africa, Sudan, Swaziland, Tanzania, Togo, Uganda, Zambia, Zimbabwe, Albania, Armenia, Azerbaijan, Egypt, Jordan, Moldova, Morocco, Tunisia, Turkey, Ukraine, Yemen, Central Asia, Kazakhstan, Kyrgyz Republic, Tajikistan, Turkmenistan, Uzbekistan, Afghanistan, Bangladesh, Cambodia, India, Indonesia, Lao People's Democratic Republic, Maldives, Nepal, Pakistan, Philippines, Sri Lanka, Thailand, Timor-Leste, Vietnam, Samoa, Bolivia, Brazil, Colombia, Dominican Republic, Ecuador, El Salvador, Guatemala, Guyana, Haiti, Honduras, Mexico, Nicaragua, Paraguay, Peru, Trinidad and Tobago | <a href="http://dhsprogram.com/Data/">http://dhsprogram.com/Data/</a>                                                                                                                                                     |
| 23 | MIDUS Midlife in the US                                        | United States of America                                                                                                                                                                                                                                                                                                                                                                                                                                                                                                                                                                                                                                                                                                                                                                                                                                                                                                                                                                                                                      | <a href="http://www.midus.wisc.edu/">http://www.midus.wisc.edu/</a>                                                                                                                                                       |
| 26 | Norwegian Mother and Child Cohort Study (Norway)               | Norway                                                                                                                                                                                                                                                                                                                                                                                                                                                                                                                                                                                                                                                                                                                                                                                                                                                                                                                                                                                                                                        | <a href="http://www.fhi.no/eway/default.aspx?pid=240&amp;trg=Main_6664&amp;Main_6664=6894:0:25,7372:1:0:0::0:0">http://www.fhi.no/eway/default.aspx?pid=240&amp;trg=Main_6664&amp;Main_6664=6894:0:25,7372:1:0:0::0:0</a> |
| 33 | Scottish Longitudinal Study (Scotland)                         | Scotland                                                                                                                                                                                                                                                                                                                                                                                                                                                                                                                                                                                                                                                                                                                                                                                                                                                                                                                                                                                                                                      | <a href="http://sls.lscs.ac.uk/">http://sls.lscs.ac.uk/</a>                                                                                                                                                               |
| 34 | Study of Environment on Aboriginal Resilience and Child Health | Australia                                                                                                                                                                                                                                                                                                                                                                                                                                                                                                                                                                                                                                                                                                                                                                                                                                                                                                                                                                                                                                     | <a href="https://www.saxinstitute.org.au/our-work/search/">https://www.saxinstitute.org.au/our-work/search/</a>                                                                                                           |
| 48 | WHO Study on Global AGEing and Adult Health (SAGE)             | South Africa, China, Ghana, India, Mexico, Russian Federation                                                                                                                                                                                                                                                                                                                                                                                                                                                                                                                                                                                                                                                                                                                                                                                                                                                                                                                                                                                 | <a href="http://www.who.int/healthinfo/sage/en/">http://www.who.int/healthinfo/sage/en/</a>                                                                                                                               |
| 49 | Worldwide Antimalarial Resistance Network                      | Thailand, Kenya, Brazil, Senegal                                                                                                                                                                                                                                                                                                                                                                                                                                                                                                                                                                                                                                                                                                                                                                                                                                                                                                                                                                                                              | <a href="http://www.wwarn.org/">http://www.wwarn.org/</a>                                                                                                                                                                 |

### 3: The Review

| <u>ID</u>          | <u>Study protocol(s)</u>               | <u>Data documentation</u>                                                                                                                                                                              | <u>Data access</u>                                                                               | <u>Online data visualisation/ analysis</u> | <u>Publication links/ descriptions</u> | <u>Social media/other forms of communication</u>                     |
|--------------------|----------------------------------------|--------------------------------------------------------------------------------------------------------------------------------------------------------------------------------------------------------|--------------------------------------------------------------------------------------------------|--------------------------------------------|----------------------------------------|----------------------------------------------------------------------|
| <a href="#">6</a>  | Questionnaires available as PDFs       | Downloadable data dictionary                                                                                                                                                                           | Data access policy and guidance available online (PDF)                                           | No                                         | Yes                                    | Facebook, Google+, Soundcloud, MyYahoo, YouTube, Twitter and QR code |
| <a href="#">12</a> | Online description of key stages       |                                                                                                                                                                                                        |                                                                                                  | No                                         | Yes                                    | Newsletter                                                           |
| <a href="#">13</a> | Questionnaires and statistical methods | Questionnaires and descriptions of the cohort/anthropometric measurements available online. All measurements were standardised using EPIC-SOFT (available in multiple languages) to enable comparison. |                                                                                                  | No                                         | Yes                                    | RSS and LinkedIn                                                     |
| <a href="#">14</a> | Online descriptions and PDFs           | Available online by year, country and theme                                                                                                                                                            | Data is available for download online in SAS, SPSS and STATA                                     | <a href="#">Yes</a>                        | Yes                                    | Email                                                                |
| <a href="#">18</a> | Study overviews available online       | Online data dictionaries available with variable names, labels and descriptions. DDI compliant metadata is available. Downloadable                                                                     | Two types: 'Public use files' and 'Licensed files' and data can be filtered according to centre. | <a href="#">Yes</a>                        | Yes                                    | Email                                                                |

|                    |                                                    |                                                                                                                                              |                                                                                                                                                                                                                                                                                                                                                                                                  |                                                                               |     |                                                                                   |
|--------------------|----------------------------------------------------|----------------------------------------------------------------------------------------------------------------------------------------------|--------------------------------------------------------------------------------------------------------------------------------------------------------------------------------------------------------------------------------------------------------------------------------------------------------------------------------------------------------------------------------------------------|-------------------------------------------------------------------------------|-----|-----------------------------------------------------------------------------------|
|                    |                                                    | microdata (must register/login)                                                                                                              |                                                                                                                                                                                                                                                                                                                                                                                                  |                                                                               |     |                                                                                   |
| <a href="#">20</a> | Questionnaires available as PDFs and HTML          | When data are extracted, codebooks are generated.                                                                                            | Online variable selection (integrated and harmonised variables options available). Users must be registered before data extracts may be downloaded. Extract system provides support for the import of generated ASCII files into SPSS, SAS and STATA.                                                                                                                                            | <a href="#">Yes</a>                                                           | Yes | Newsletter                                                                        |
| <a href="#">22</a> | Questionnaires are available for download (PDF)    | Data are recoded (variable names, locations etc.) with all recording manuals available for download online. Use the DHS Recode.              | Must be a registered user of the website. Application for data must include contact information, research project title and description of intended analysis. Certain data require users to sign additional agreements/terms of use. Files are distributed as compressed Zip files. List of potential data downloads is available online. Data are available in ASCII, STATA, SPSS, SAS and CPro | Yes - <a href="#">HIV/AIDS Survey Indicators Database &amp; STAT compiler</a> | Yes | Email, Facebook, Twitter, YouTube, LinkedIn, Pinterest, Blog and Mobile phone app |
| <a href="#">23</a> | Available in catalogue/ICPSR website               | Categories, codes, variable grouping etc. available through Colectica catalogue. DDI Codebook/Lifecycle, Dublin Core and MARC21 XML metadata | Data is available for download online in SAS, SPSS, STATA, ASCII and Delimited from ICPSR website                                                                                                                                                                                                                                                                                                | No                                                                            | Yes | LinkedIn, Facebook, Google or MyData                                              |
| <a href="#">26</a> | Online description and downloadable questionnaires | Basic participant response figures available online for version VIII                                                                         | Applications must be submitted and approved before use of data and/or biological materials is enabled. Researcher(s) may need to sign a contract with the Norwegian Institute of Public Health                                                                                                                                                                                                   | No                                                                            | Yes | Facebook, Twitter, YouTube, RSS feed and newsletter                               |



|                    |                                                                                               |                                                                                                                                                                                  |                                                                                                                                                                                                                                                                                                              |                     |     |                                             |
|--------------------|-----------------------------------------------------------------------------------------------|----------------------------------------------------------------------------------------------------------------------------------------------------------------------------------|--------------------------------------------------------------------------------------------------------------------------------------------------------------------------------------------------------------------------------------------------------------------------------------------------------------|---------------------|-----|---------------------------------------------|
| <a href="#">33</a> | Online descriptions of creation/development available as individual 'Technical Working Paper' | Online data dictionary with searchable lists of tables and variables                                                                                                             | 2 methods - 'safe setting' in Edinburgh or remote access involving use of variable names and labels only for creation of syntaxes. These syntaxes are then returned to the Support Officer who will arrange for the analysis to be run and the results, once cleared returned. More details available online | No                  | Yes | Twitter, email, blog                        |
| <a href="#">34</a> | Study protocol available as an academic paper                                                 |                                                                                                                                                                                  | Describes 'SURE' Secure, Unified Research Environment' but does not make it clear if SEARCH data can be accessed                                                                                                                                                                                             | No                  | Yes | Email, Facebook, RSS, LinkedIn and Twitter  |
| <a href="#">48</a> | Summary of measures in questionnaires and the questionnaires themselves available in PDF      | Related materials, study description, data dictionary (variables include name, label and question) and related citations all available. DDI compliant metadata available in PDF. | Through WHO Multi-Country Studies Data Archive.                                                                                                                                                                                                                                                              | No                  | Yes | RSS, YouTube, twitter, Facebook and Google+ |
| <a href="#">49</a> | Searchable procedures available for download                                                  | When sharing data (clinical, pharmacology, In vitro) data dictionaries should be accompany data                                                                                  | WWARN standardise data and then make these available including of audit trail and original dataset to the data contributor and nominated individuals. Researchers (under 'Third party data access') should contact the data owner(s) as they alone can grant access to the transformed data.                 | <a href="#">Yes</a> | Yes | Facebook and twitter                        |

## Annex B: Profiles – Documenting Cohorts and Data Resources

### Cohort Profiles

Cohort profiles, as published by the International Journal of Epidemiology[1], describe particular epidemiological studies. These concise publications of around 2500 to 3000 words, present key facts about cohorts using descriptors such as, ‘Why was the cohort set up?’[2] and ‘What has been measured?’[2] Cohort profiles also include generalised descriptions of any anthropometric measurements taken and provide an indication of the key findings to date.

A key part of cohort profile publications is the section, ‘Can I get hold of the data? Where can I find out more?’[2]. Having this kind of information in a standardised way has the potential to support research endeavours and promote adoption of the research data lifecycle. It is also in keeping with recent data sharing and open access initiatives.

### Case Study

A search on PubMed[3] using the phrase ‘Cohort Profile International Journal of Epidemiology’ returned 224\* results with the most recently indexed publication\* being Cohort Profile: the Health and Retirement Study (HRS)[4]. This is a longitudinal, US-based study with over 37000 participants from 23000 households. Sister studies include, but are not limited to, the English Longitudinal Study of Aging[5] and The China Health and Retirement Longitudinal Study (CHARLS)[6]; both of which have cohort profiles.

### Data Resource Profiles

A data resource profile describes epidemiological data available for use by researchers for purposes of testing hypotheses and performing analyses. Similarly to cohort profiles, these publications are short at around 2500 to 3000 words and include key information such as ‘Data resource area and population coverage’[2] and ‘Strengths and weaknesses’.[2]

Descriptions of how and where the data may be accessed are of particular importance to characterising the dataset especially to potential future users. Recently published examples include, Countdown to 2015: Maternal, Newborn and Child Survival[7] and United Nations Children’s Fund (UNICEF)[8]

\*correct 01/04/2014

1. *International Journal of Epidemiology*. 2014 [cited 2014 April 01]; Available from: <http://ije.oxfordjournals.org/>.
2. *Instructions to authors*. 2014 [cited 2014 April 01]; Available from: [http://www.oxfordjournals.org/our\\_journals/ije/for\\_authors/general.html](http://www.oxfordjournals.org/our_journals/ije/for_authors/general.html).

3. PubMed. 2014 [cited 2014 April 01]; Available from: <http://www.ncbi.nlm.nih.gov/pubmed/#>.
4. Sonnega, A., et al., Cohort Profile: the Health and Retirement Study (HRS). *Int J Epidemiol*, 2014.
5. Steptoe, A., et al., Cohort Profile: The English Longitudinal Study of Ageing. *Int J Epidemiol*, 2013. **42**(6): p. 1640-1648.
6. Zhao, Y., et al., Cohort Profile: The China Health and Retirement Longitudinal Study (CHARLS). *Int J Epidemiol*, 2014. **43**(1): p. 61-68.
7. Requejo, J., C. Victora, and J. Bryce, Data Resource Profile: Countdown to 2015: Maternal, Newborn and Child Survival. *Int J Epidemiol*, 2014.
8. Murray, C. and H. Newby, Data Resource Profile: United Nations Children's Fund (UNICEF). *Int J Epidemiol*, 2012. **41**(6): p. 1595-1601.

## Annex C: Survey Questionnaire

The questionnaire was conducted online, the questions are reproduced below:

### Data Discoverability Survey

Thank you for your interest in completing this survey, which has been commissioned by Wellcome Trust to support the work of the Public Health Research Data Forum.

The aim of this survey is to enhance our understanding of the current challenges facing everyone in making research datasets 'discoverable'. A great deal of emphasis is currently being placed on the promotion of data sharing, however this is only part of the challenge. The following questions seek to explore the issues in more detail but are necessarily brief.

We have tried to design this survey so that it is easy to complete within one sitting of no more than 10 minutes although it is possible for you to save and return if you run out of time.

Thank you again for taking the time.

## Background information

Please use the following sections to tell us a bit about yourself.

### Main employer or employment status

- University
- Government agency
- Non-governmental organization
- Charity
- Private company
- Self-employed
- Student
- Unemployed
- Retired

(Please select the option that applies best to you)

### Please indicate the regions of the world where you carry out your work

- Southern Asia
- Eastern Asia
- Europe
- South-Eastern Asia
- South America
- Eastern Africa
- Northern America
- Western Africa
- Western Asia
- Northern Africa
- Central America
- Middle Africa
- Central Asia
- Southern Africa
- Caribbean
- Oceania

(Please tick all that apply)

**How would you describe your role in public health research data**

- Data provider
- Data user
- Archivist / Librarian
- Funding agency
- Policy maker
- Observer
- Other

(Please select all that apply)

**Other role:** \_\_\_\_\_

(Please briefly describe the role)

**Are you in receipt of funding from any of the following agencies**

- Agency for Healthcare Research and Quality (USA)
- Bill and Melinda Gates Foundation
- Canadian Institutes of Health Research
- Centres for Disease Control and Prevention
- Deutsche Forschungsgemeinschaft (DFG)
- Doris Duke Charitable Foundation
- Economic and Social Research Council (UK)
- Health Research Council of New Zealand
- Health Resources and Services Administration (USA)
- Hewlett Foundation
- INSERM
- Medical Research Council (UK)
- National Health and Medical Research Council
- (Australia)
- National Institutes of Health (USA)
- Substance Abuse and Mental Health Services
- Administration (USA)
- Wellcome Trust
- The World Bank
- NIHR (UK)
- Other(s)

(Please tick all that apply)

**Other funders (please list one per line):** \_\_\_\_\_

**Please indicate the forms of data that you commonly handle**

- Survey
- Healthcare records
- Disease registries
- Ethnographic
- Geospatial
- Environmental
- Genomic/Proteomic/Metabolomic
- Imaging
- Physiological measurement
- Other

(Please tick all that apply)

**What other form(s) of data do you commonly work with? \_\_\_\_\_**

**Please indicate which areas of the research data life-cycle are you actively involved in**

- Conceptualisation
- Creation or receipt
- Appraisal & Selection
- Analysis
- Metadata creation
- Preservation action
- Storage
- Access, use and reuse
- Transformation
- Data Destruction
- Archive management
- Administration

## Data Discoverability

What are the most important things that are needed to promote data discoverability?

Please indicate below how important you consider each aspect of discoverable data:

|                                                             | Not at all               | Slightly                 | Fairly                   | Extremely                | Essential                |
|-------------------------------------------------------------|--------------------------|--------------------------|--------------------------|--------------------------|--------------------------|
| be on the web                                               | <input type="checkbox"/> |
| be provided in a machine-readable form                      | <input type="checkbox"/> |
| be provided in a non-proprietary form                       | <input type="checkbox"/> |
| conform with recognised data management standards           | <input type="checkbox"/> |
| be linked to an underlying conceptual framework or ontology | <input type="checkbox"/> |

### Preferred search options

- Keyword
- Subject terms
- Concepts
- Related concepts

(Please tick all that apply)

What aspects of a research study should ideally be easily searchable?

- Research study question
- Research study protocol
- Research data management plan
- Consent form and associated information pack
- Funding details
- Data collection instrument designs
- Variables
- Code lists
- Concepts
- Research publications

(Please tick all that apply)

Is there any other aspect of data discoverability that you feel is important?

\_\_\_\_\_ (Please provide any other observation or concern)



How could discoverability of public health data be improved and do you see any immediate priorities?

---

The following is a list of some repository services and classes of repositories that exist, mostly taken from Nature's website. The web-link gives examples of repositories for many of the categories below. Please indicate the repositories that you have used (data access, deposit or both) in the past or anticipate using in future.

|                                             | Already used             | Intend to use            |
|---------------------------------------------|--------------------------|--------------------------|
| Dryad                                       | <input type="checkbox"/> | <input type="checkbox"/> |
| Figshare                                    | <input type="checkbox"/> | <input type="checkbox"/> |
| ClinicalTrials.gov                          | <input type="checkbox"/> | <input type="checkbox"/> |
| Social Science e.g. ICPSR / UK Data Archive | <input type="checkbox"/> | <input type="checkbox"/> |
| DNA protein sequences                       | <input type="checkbox"/> | <input type="checkbox"/> |
| Genetic association & genome variation      | <input type="checkbox"/> | <input type="checkbox"/> |
| Functional genomics                         | <input type="checkbox"/> | <input type="checkbox"/> |
| Proteomics                                  | <input type="checkbox"/> | <input type="checkbox"/> |
| Molecular interactions                      | <input type="checkbox"/> | <input type="checkbox"/> |
| Molecular structure                         | <input type="checkbox"/> | <input type="checkbox"/> |
| Taxonomy & species diversity                | <input type="checkbox"/> | <input type="checkbox"/> |
| Organism or disease specific resources      | <input type="checkbox"/> | <input type="checkbox"/> |
| Environmental & geoscience                  | <input type="checkbox"/> | <input type="checkbox"/> |
| Other                                       | <input type="checkbox"/> | <input type="checkbox"/> |

You selected "Other" in the list of repositories above. Please provide details.

---

## Controlled Vocabularies and Thesauri

Standardised taxonomies are commonly used approaches to enhance data discovery and facilitate comparison across datasets.

Please indicate which of the following terminologies, classifications, thesauri or metathesauri you are familiar with

- SNOMED CT
- OPCS-4
- International Classification of Disease (ICD)
- Logical Observation Identifiers Names and Codes (LOINC)
- Diagnostic and Statistical Manual of Mental Disorders (DSM 5)
- Read Codes
- Medical Subject Headings (MeSH)
- Humanities and Social Sciences Electronic
- Thesaurus (HASSET)
- European Language Social Science Thesaurus (ELSST)
- Unified Medical Language Service (UMLS)
- Other

(Please tick all that apply)

If your answer to the previous question included "Other" please specify

---

Which tools do you use to assist with the management of controlled vocabularies? For example, UMLS, Library of Congress, WHO Global Health Observatory indicator registry

---

## Data documentation

In order that researchers can reuse research data meaningfully it is important to ensure that data are provided with detailed descriptors, typically this has been in the form of a code book plus ancillary documentation that describes the processes associated with data collection and any processing that has been carried out.

The following is a list of standards to assist with data documentation. Please indicate which of these you have experience of knowingly using.

- DC
- SDMX
- EAD
- METS
- DCAT
- CKAN
- eGMS
- INSPIRE
- ADMS
- DDI 2/3

(Please tick all that apply)

Which tools do you use to assist you with data documentation? \_\_\_\_\_

Which are the key challenges in creating/using documenting data? \_\_\_\_\_

## Data Citation and Data Publications

Citation of data is becoming an important tool to promote and track data reuse. Data publication offers a mechanism to promote data citation. The following section explores your views and understanding of these options.

It is possible to publish articles that describe research datasets independently of conventional research publications. Are you familiar with this form of data publication?

- Yes
- No

Where did you first hear about data publications?

- Colleague
- Journal
- Conference/workshop
- Search engine
- Other

(Please tick all that apply)

If your answer to the previous question included 'other' please specify.

---

Please indicate which benefit(s) of data citation are most important to you

- Easier for readers to locate data
- Proper credit given to data contributors
- Links between datasets and associated methodology publication provide context for reader
- Links between datasets and publications describing their use can demonstrate impact.
- Infrastructure can support long-term reference and reuse
- Less danger of data plagiarism
- Promotes professional recognition and rewards
- Other

(Please tick all that apply)

What other benefits do you see in data citation? \_\_\_\_\_

**How granular should data citations be:**

- Dataset collections
- Single datasets (or sweep)
- Files within datasets
- Individual items of data
- Other

(Please tick all that apply)

**Since you selected other above, please give your suggestion here:** \_\_\_\_\_

**Ideally, how should longitudinal and regularly changing datasets be handled?**

- New identifier assigned at each update
- Publish revisions at regular intervals
- Time series data should be published as complete 'snapshots'
- Time series data should be published in instalments
- All published versions of the datasets must be stored
- Other

(Please tick all that apply)

**Other mechanism suggested for handling longitudinal and changing datasets:**

\_\_\_\_\_

**Which would you say, if any, are the key challenges affecting the widespread adoption of data publications?** \_\_\_\_\_

## Annex D: Results of Online Survey

The following graphs and tables present the findings of the online survey. Note that multiple selections were allowed for each respondent.

### Employment of respondents

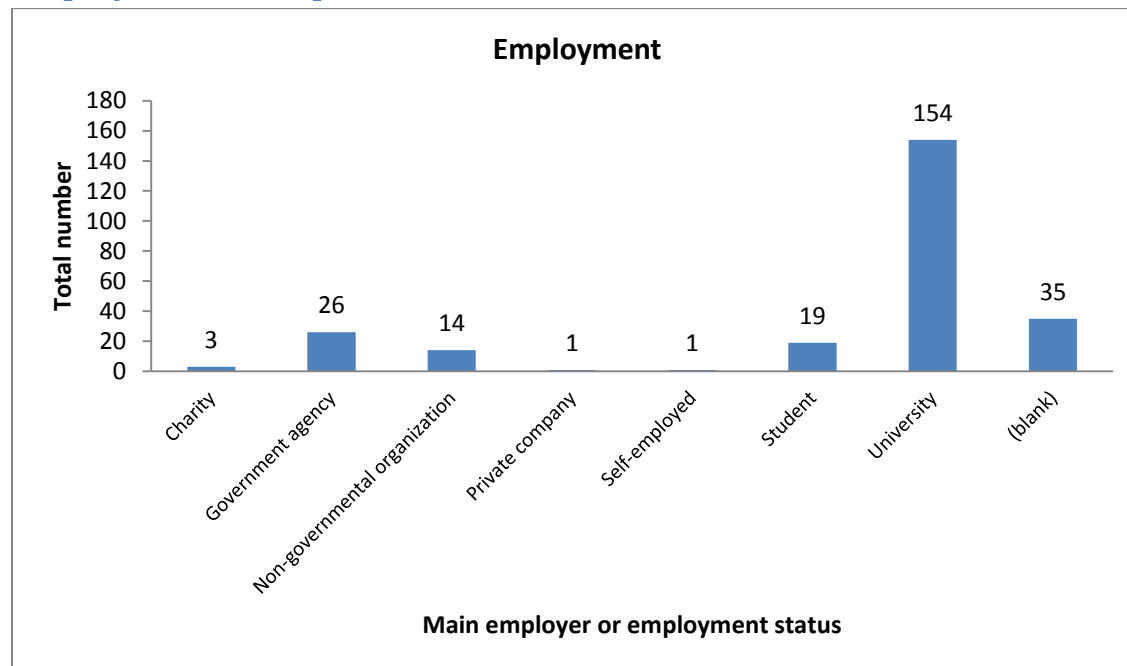

**218 respondents**

### Geographical regions of respondents

|                    |     |
|--------------------|-----|
| Southern Asia      | 20  |
| Eastern Asia       | 12  |
| Europe             | 108 |
| South-Eastern Asia | 18  |
| South America      | 11  |
| Eastern Africa     | 30  |
| Northern America   | 31  |
| Western Africa     | 28  |
| Western Asia       | 6   |
| Northern Africa    | 9   |
| Central America    | 5   |
| Middle Africa      | 9   |
| Central Asia       | 5   |
| Southern Africa    | 29  |
| Caribbean          | 4   |
| Oceania            | 49  |

**245 Respondents**

**Role in public health**

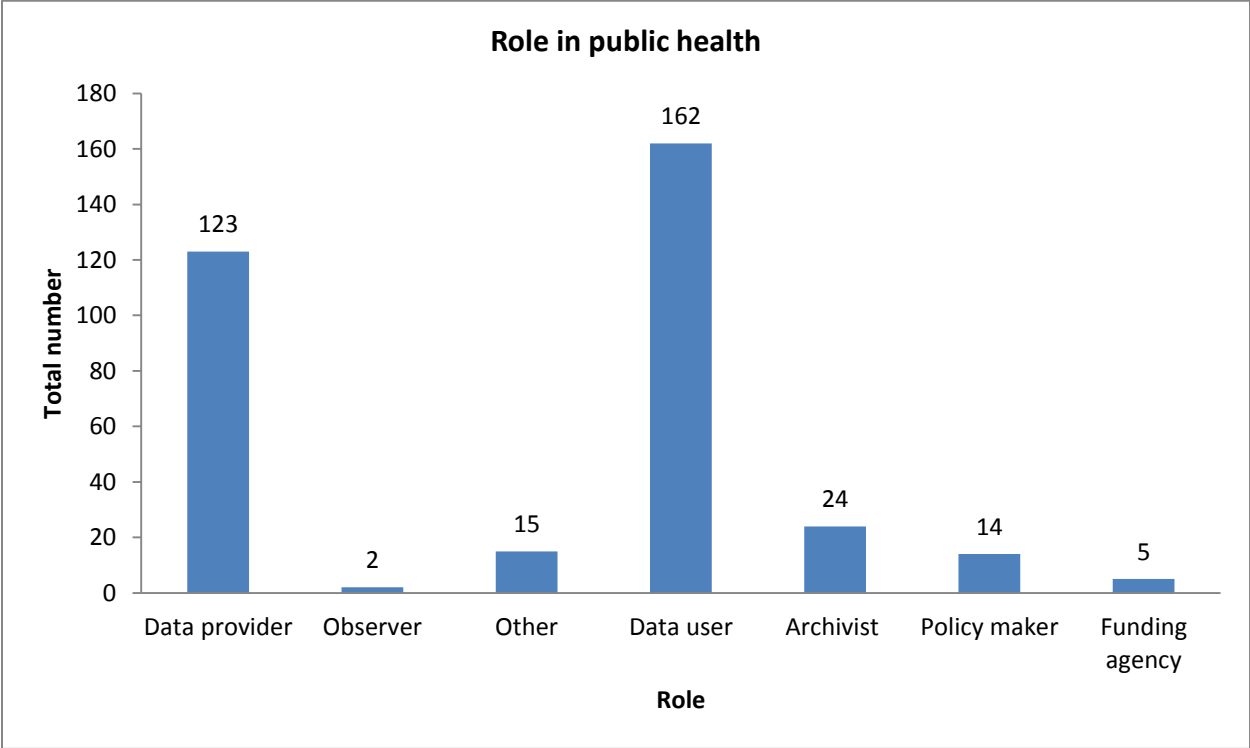

**213 Respondents**

## Most common funders

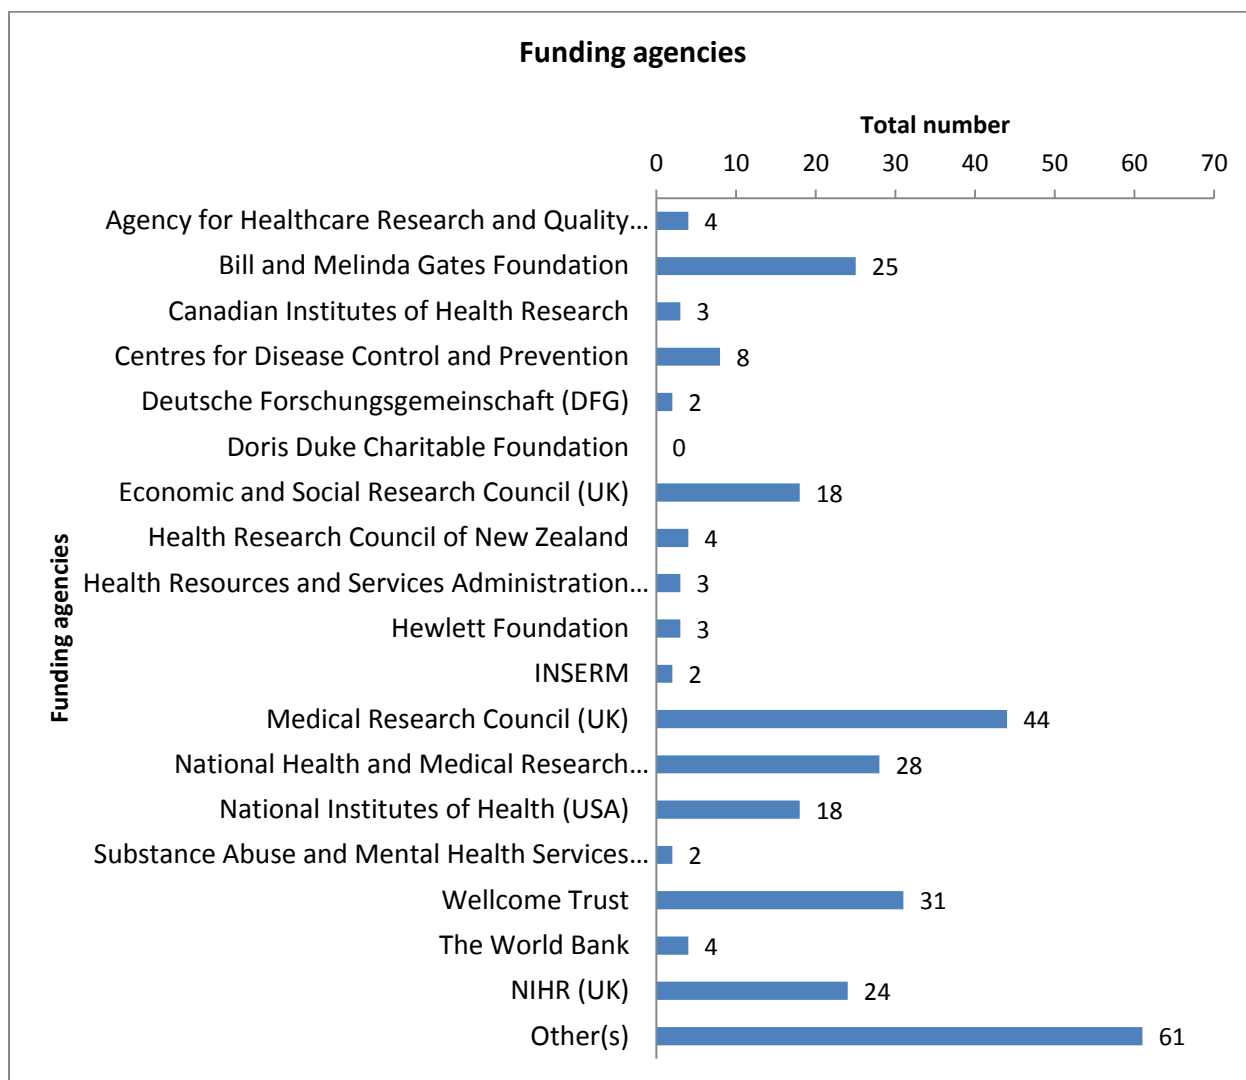

## 175 Respondents

### Forms of data

|                               |     |
|-------------------------------|-----|
| Survey                        | 157 |
| Healthcare records            | 125 |
| Disease registries            | 76  |
| Ethnographic                  | 24  |
| Geospatial                    | 46  |
| Environmental                 | 31  |
| Genomic/Proteomic/Metabolomic | 30  |
| Imaging                       | 19  |
| Physiological measurement     | 47  |
| Other                         | 37  |

## 211 respondents



## Involvement in the data lifecycle

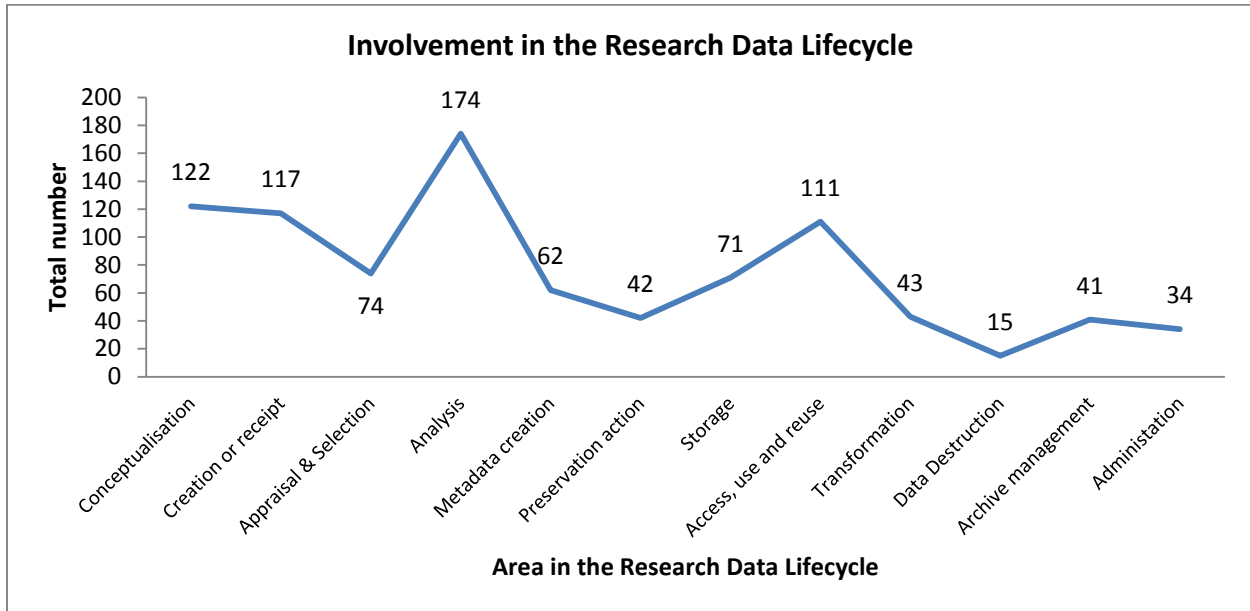

**214 respondents**

## How best to improve data discoverability - importance

| Aspect                                                      | Opinion   |           |        |          |            |         | Total number |
|-------------------------------------------------------------|-----------|-----------|--------|----------|------------|---------|--------------|
|                                                             | Essential | Extremely | Fairly | Slightly | Not at all | (blank) |              |
| be on the web                                               | 83        | 69        | 31     | 7        | 9          | 54      | 253          |
| be provided in a machine-readable format                    | 94        | 74        | 19     | 3        | 6          | 57      | 253          |
| be provided in a non-proprietary form                       | 44        | 61        | 64     | 5        | 14         | 65      | 253          |
| conform with recognised data management standards           | 55        | 82        | 50     | 1        | 5          | 60      | 253          |
| be linked to an underlying conceptual framework or ontology | 20        | 45        | 78     | 14       | 34         | 62      | 253          |

**201 Respondents**

## Preferred search techniques

|                  |     |
|------------------|-----|
| Concepts         | 66  |
| Related concepts | 33  |
| Subject terms    | 133 |
| Keyword          | 181 |

**207 Respondents**

## Use of repositories

| Repositories                           | Use (total number of people) |                  |                       |                  |         |
|----------------------------------------|------------------------------|------------------|-----------------------|------------------|---------|
|                                        | Already used                 |                  | Intended to use       |                  | (blank) |
|                                        | Number of respondents        | % of respondents | Number of respondents | % of respondents |         |
| Dryad                                  | 2                            | 0.79             | 6                     | 2.37             | 0       |
| Figshare                               | 5                            | 1.98             | 9                     | 3.56             | 0       |
| ClinicalTrials.gov                     | 58                           | 22.92            | 18                    | 7.11             | 0       |
| Social Science                         | 47                           | 18.58            | 1                     | 0.40             | 0       |
| DNA protein sequences                  | 6                            | 2.37             | 2                     | 0.79             | 0       |
| Genetic association & genome variation | 17                           | 6.72             | 5                     | 1.98             | 0       |
| Functional genomics                    | 8                            | 3.16             | 4                     | 1.58             | 0       |
| Proteomics                             | 1                            | 0.40             | 5                     | 1.98             | 0       |
| Molecular interactions                 | 4                            | 1.58             | 2                     | 0.79             | 0       |
| Molecular structure                    | 3                            | 1.19             | 2                     | 0.79             | 0       |
| Taxonomy & species diversity           | 3                            | 1.19             | 5                     | 1.98             | 0       |
| Organism or disease specific resources | 13                           | 5.14             | 7                     | 2.77             | 0       |
| Environmental & geoscience             | 16                           | 6.32             | 9                     | 3.56             | 0       |
| Other                                  | 20                           | 7.91             | 6                     | 2.37             | 0       |
|                                        |                              |                  |                       |                  |         |
| Total                                  | 203                          | 80.24            | 81                    | 32.02            | 0       |

**138 Respondents**

## Controlled vocabularies and thesauri

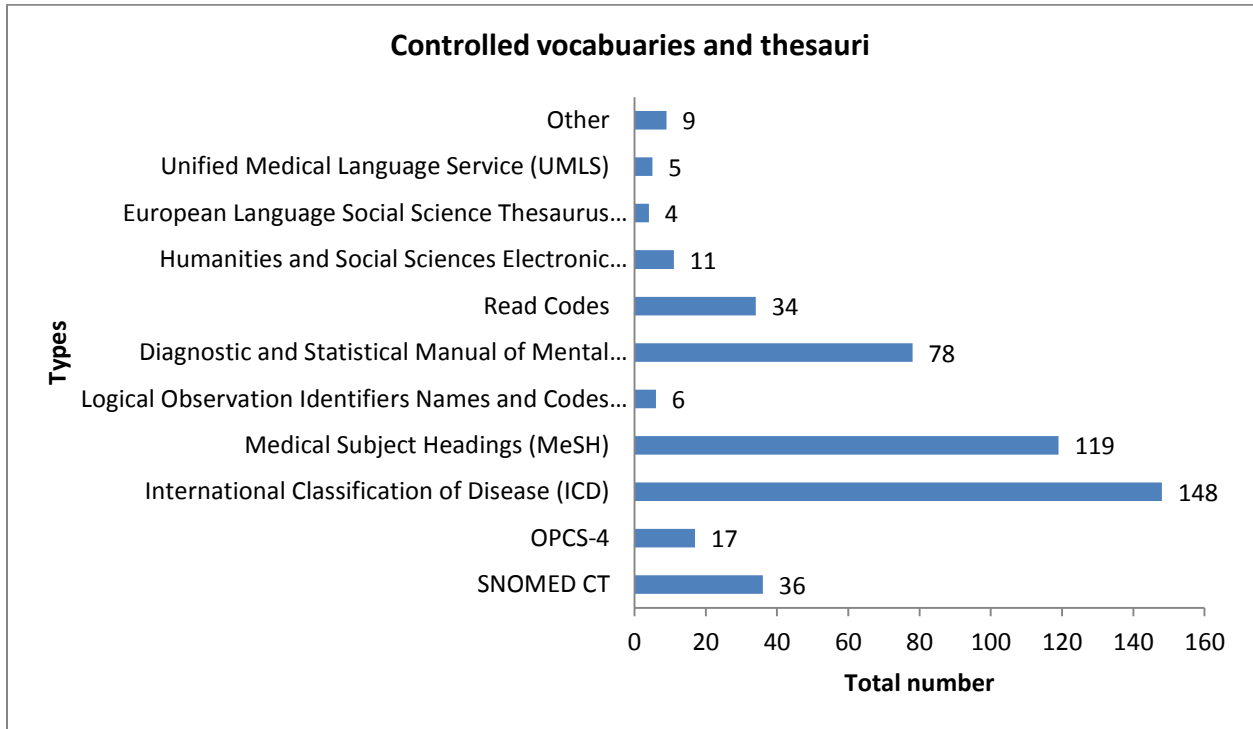

**163 Respondents**

## Data documentation – use of standards

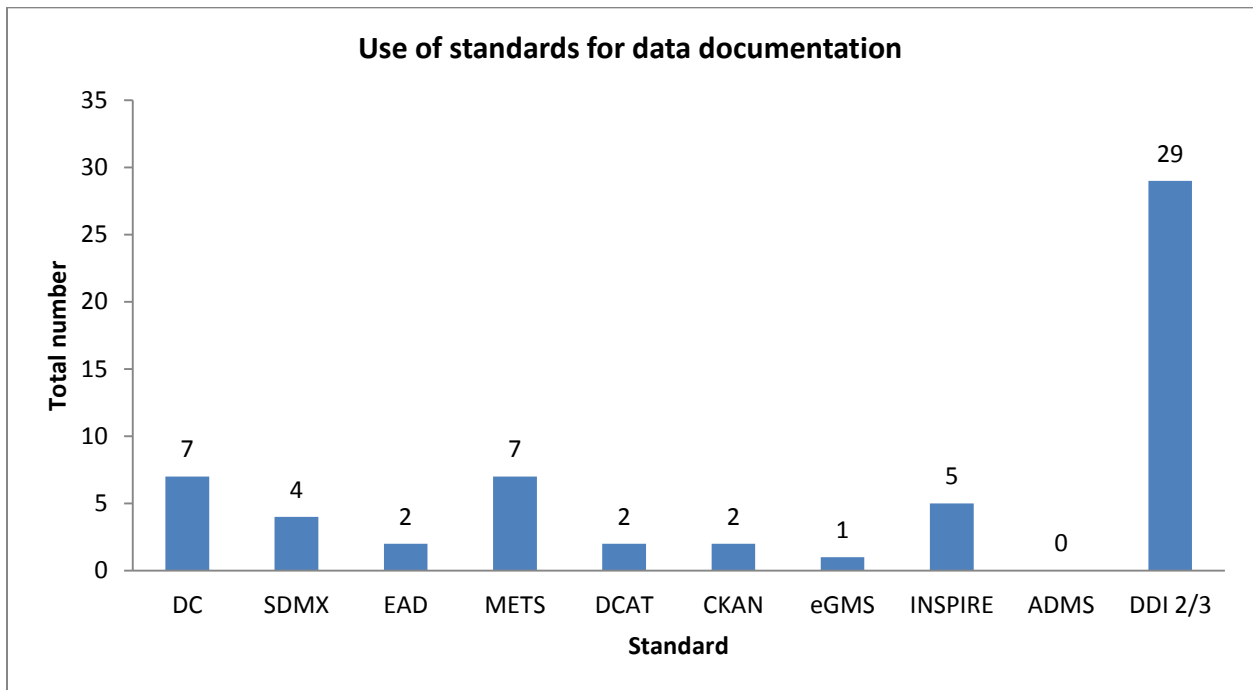

**43 Respondents**

## First heard about data journals

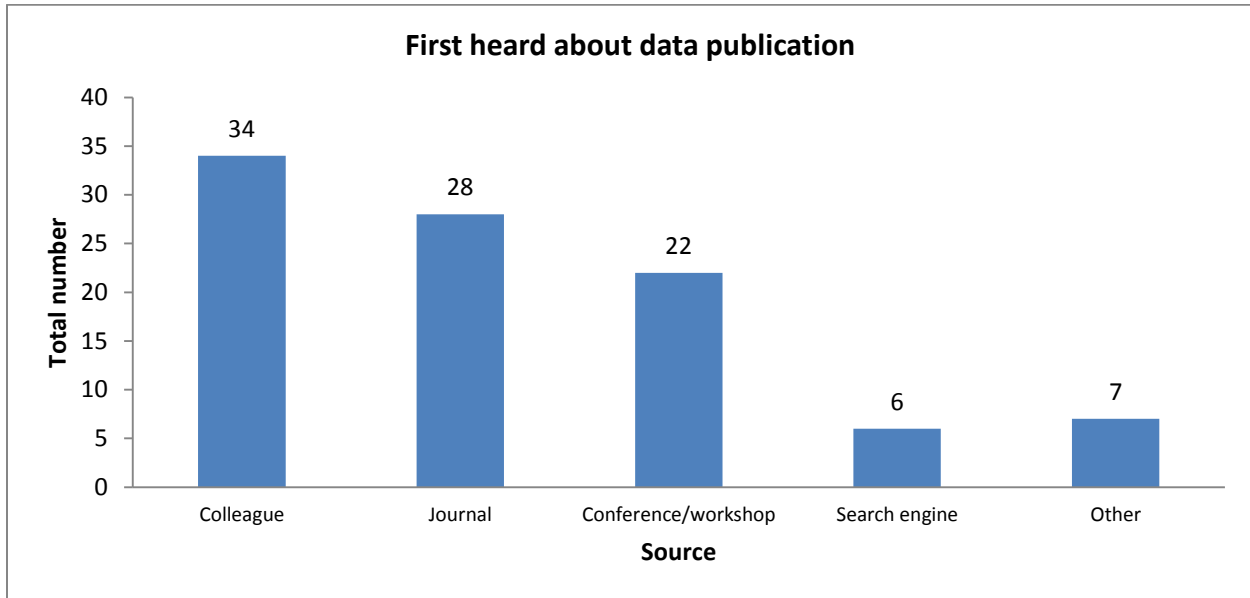

**79 Respondents**

## Benefits of data citation

|                                                                                          |     |
|------------------------------------------------------------------------------------------|-----|
| Easier for readers to locate data                                                        | 137 |
| Proper credit given to data contributors                                                 | 113 |
| Links between datasets and associated methodology publication provide context for reader | 114 |
| Links between datasets and publications describing their use can demonstrate impact      | 77  |
| Infrastructure can support long-term reference and reuse                                 | 69  |
| Less danger of data plagiarism                                                           | 40  |
| Promotes professional recognition and rewards                                            | 64  |
| Other                                                                                    | 4   |

**160 Respondents**

## Needed granularity of data citation

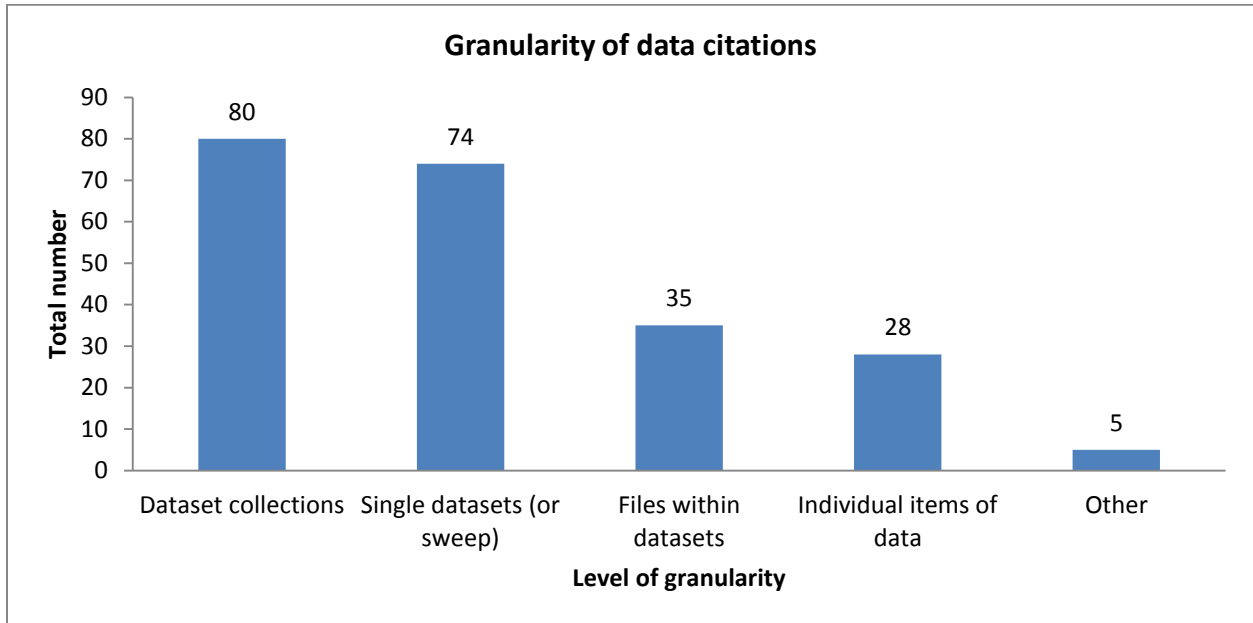

**134 Respondents**

## Mechanisms for managing longitudinal and regularly changing data sets

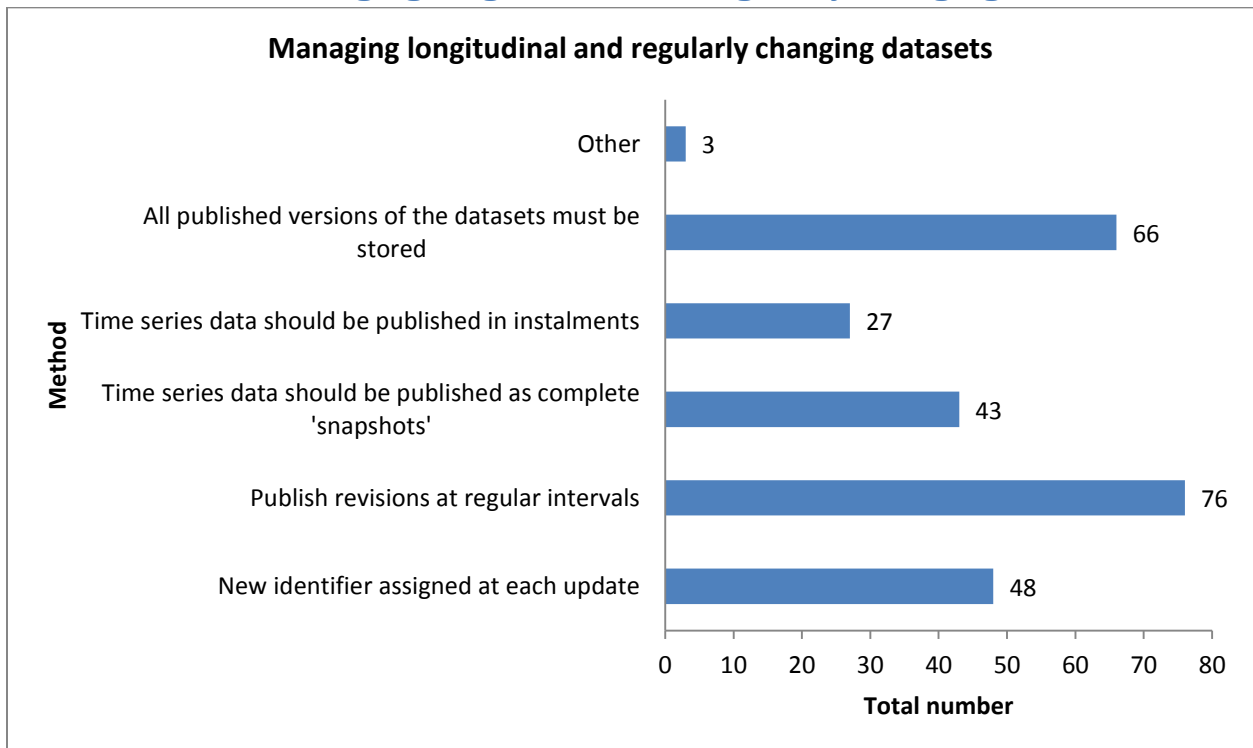

**140 Respondents**

## Annex E: Topic Guidelines for Focus Groups

### Overview

- Introductions
- Experience with data
  - Discovering data
  - Using data
- Technology and standards
  - Data portals
  - Data journals
  - Web of Linked Data
  - Standards

### Introductions

- Who are you?
- What is your institutional affiliation?
- Where are you in your professional career?
- What is the focus of your research?
- What publications are the most important to you professionally?
- What data sets do you work with most often?

### Experience with Data

- How do you discover good data?
- What is “good data”?
- What information is most important when you are looking for data?
- Are you satisfied with the quality of available data sets?
- What issues do you have with the quality of the data available to you?
- What information is most important when working with data?
- Are you satisfied with the quality of the documentation/metadata available to you?
- What are the main issues you face when working with data?

### Technology and Standards – Examples Provided for Discussion

- Data Portals
- Data journals
- Semantic Web/Web of Linked Data
- Standards for data and metadata

## Annex F: Project Data Journal – Progress to Date

The ‘Exemplar Public Health Datasets’ collection (<http://openhealthdata.metajnl.com/collections/special/exemplar-public-health-datasets>) will launch in late-summer 2014 and feature invited papers describing datasets that are outstanding in the field of public health. Published in the journal Open Health Data, the collection will launch with five papers in the first instance, with 10-15 more expected thereafter. We originally invited roughly 150 authors and received 22 positive responses, resulting in five submissions thus far and the remainder will be submitted over the next six months. For such a new concept, this response rate can be considered quite high, especially given the short deadline we set authors.

Whilst we are unable to report the exact subjects of the submitted papers (as they are currently being peer-reviewed), the majority describe data from longitudinal/cohort studies from a mixture of publicly available data and data with accessibility criteria. This in itself created a few problems because the original article submission template was designed for single, openly accessible datasets, rather than studies with numerous files and conditions for access. Consequently, the template was revised to incorporate longitudinal studies and studies with access criteria.

Data journals have a number of purposes: facilitating discoverability, crediting data producers, allowing data to be cited, and so on. However, until this particular collection we had not appreciated the potential for data journals to formalise the various access criteria associated with different studies. As such, the collection will showcase data for which, until now, the accessibility criteria were not readily available in a centralised location. We see this as a positive step and another selling point of the data journal model.

Finally, we expect to publish papers where the data itself is not publicly available, due to consent restrictions, but where additional materials surrounding the data collection have been uploaded in an openly accessible fashion, such as consent forms, protocols, data management plans and data access policies, all of which will benefit by wider circulation. This helps broaden the scope of the data journal and makes it more than just a tool for sharing data.

While the uptake of the collection could have been higher, the uptake does reflect the current research culture of data sharing. As far as the ordinary researcher is concerned, there are perceived disincentives for sharing one’s data that outweigh the perceived benefits. Collections such as ‘Exemplar Public Health Datasets’ will help to change this by demonstrating that data journals are being taken up by senior scholars to showcase their well-known studies.
